# Supplementary material
Source: publisher figshare collection journal article supplement (https://tandf.figshare.com/ndownloader/files/21393507)
Supplement: Supplementary file 1 [file 21393507]

**Supplemental Table 1.** Search strategies for EMBASE®, MEDLINE®, and Cochrane databases for the epidemiology and treatment patterns reviews.

| Epidemiology review | | |
| --- | --- | --- |
| No. | Search string | Hits |
| 1 | ‘primary mediastinal b cell lymphoma’/exp OR ‘primary mediastinal b cell lymphoma’ OR ‘pmbcl’:ab,ti OR ‘pmlbcl’:ab,ti OR ‘pmbl’:ab,ti OR ‘mlbcl’:ab,ti OR ‘mbcl’:ab,ti OR ‘thymic large b cell lymphoma’ | 948 |
| 2 | ‘b cell lymphoma’/syn OR ‘diffuse large b cell lymphoma’/exp OR dlbcl:ab,ti | 124,433 |
| 3 | ‘mediastinal’ OR ‘thymic’ OR ‘pmbcl’:ab,ti | 77,738 |
| 4 | #2 AND #3 | 4309 |
| 5 | (mediastinal OR thymic) NEXT/3 lymphoma | 1859 |
| 6 | ‘diffuse large b cell lymphoma’:ab,ti | 16,371 |
| 7 | #1 OR #4 OR #5 OR #6 | 21,002 |
| 8 | ‘epidemiology’:ab,ti OR ‘incidence’:ab,ti OR ‘prevalence’:ab,ti OR ‘mortality’:ab,ti OR ‘morbidity’:ab,ti | 2,441,668 |
| 9 | #7 AND #8 | 2981 |
| 10 | #9 AND [animals]/lim | 243 |
| 11 | #9 AND ([conference abstract]/lim OR [conference review]/lim OR [editorial]/lim OR [erratum]/lim OR [letter]/lim) | 1519 |
| 12 | #10 OR #11 | 1676 |
| 13 | #9 NOT #12 | 1305 |
| **14** | **#13 AND [1997-2017]/py** | **1209** |
| Treatment patterns review | | |
| No. | Search string | Hits |
| 1 | ‘primary mediastinal b cell lymphoma’/exp OR ‘primary mediastinal b cell lymphoma’ OR ‘pmbcl’:ab,ti OR ‘pmlbcl’:ab,ti OR ‘pmbl’:ab,ti OR ‘mlbcl’:ab,ti OR ‘mbcl’:ab,ti OR ‘thymic large b cell lymphoma’ | 948 |
| 2 | ‘b cell lymphoma’/syn OR ‘diffuse large b cell lymphoma’/exp OR dlbcl:ab,ti | 124,433 |
| 3 | ‘mediastinal’ OR ‘thymic’ OR ‘pmbcl’:ab,ti | 77,738 |
| 4 | #2 AND #3 | 4309 |
| 5 | (mediastinal OR thymic) NEXT/3 lymphoma | 1859 |
| 6 | ‘diffuse large b cell lymphoma’:ab,ti | 16,371 |
| 7 | #1 OR #4 OR #5 OR #6 | 21,002 |
| 8 | ‘inoperable cancer’:ab,ti OR second*:ab,ti OR progress*:ab,ti OR relaps*:ab,ti OR recurren*:ab,ti OR fail*:ab,ti OR resistan*:ab,ti OR pretreated:ab,ti OR refract*:ab,ti OR previous*:ab,ti OR salvage:ab,ti OR ‘second-line’:ab,ti OR ‘second line’:ab,ti | 7,039,717 |
| 9 | ‘treatment pattern*’ OR ‘treatment option*’ OR ‘treatment trend*’ OR ‘administration pattern*’ OR ‘prescribing practice*’ OR (treatment NEAR/2 (pattern* OR trend* OR option*)) OR ‘treatment strateg*’ OR ‘medication switch*’ OR ‘treatment switch*’ OR ‘drug switch*’ OR ((‘real world’ NEAR/2 (pattern* OR trend* OR practice*)):ab,ti) OR ‘register’/de OR regist*:ab,ti OR ‘data base’/de OR database:ab,ti OR ‘data base’:ab,ti OR ((‘real world’ NEXT/1 (evidence OR data)):ab,ti) OR ‘health care record*’:ab,ti OR ‘healthcare record*’:ab,ti OR ‘medical record*’:ab,ti OR cohort*:ab,ti OR (((‘follow up’ OR followup) NEXT/1 (study OR studies)):ab,ti) OR ‘cohort analysis’/exp OR ‘longitudinal study’/exp OR ‘prospective study’/exp OR ‘clinical article’/exp OR ‘retrospective study’/exp OR ‘case control study’/exp OR ((case* NEXT/1 control*):ab,ti) OR ‘practice guideline’/exp OR ‘practice near/2 guideline*’ OR ‘treatment guideline’:ab,ti | 4,496,155 |
| 10 | #7 AND #8 AND #9 | 4487 |
| 11 | #10 AND [animals]/lim | 205 |
| 12 | #10 AND ([conference abstract]/lim OR [conference review]/lim OR [editorial]/lim OR [erratum]/lim OR [letter]/lim) | 2377 |
| 13 | #11 OR #12 | 2413 |
| 14 | #10 NOT #13 | 2074 |
| **15** | **#13 AND [1997-2017]/py** | **1958** |
